# Supplementary material for: Controlled Growth Cu2S Nanoarrays with High-Performance Photothermal Properties
Source: MDPI journal article supplement (doi:10.3390/nano13071260), 2023-04-03
Supplement: s1 [file s1]

## Supplementary Materials

# Controlled Growth Cu<sub>2</sub>S Nanoarrays with High-Performance Photothermal Properties

Huanran Miao <sup>1</sup>, Yanlong Wu <sup>2</sup>, Cheng Zhou <sup>2</sup>, Zhimao Yang <sup>1</sup> and Chuncai Kong <sup>1,\*</sup>

<sup>1</sup> Ministry of Education Key Laboratory for Non-equilibrium Synthesis and Modulation of Condensed Matter, School of Physics, Xi'an Jiaotong University, Xi'an 710049, China

<sup>2</sup> China Academy of Space Technology, Beijing, 100094, China; long51641@126.com (Y.W.)

\* Correspondence: kongcc@xjtu.edu.cn

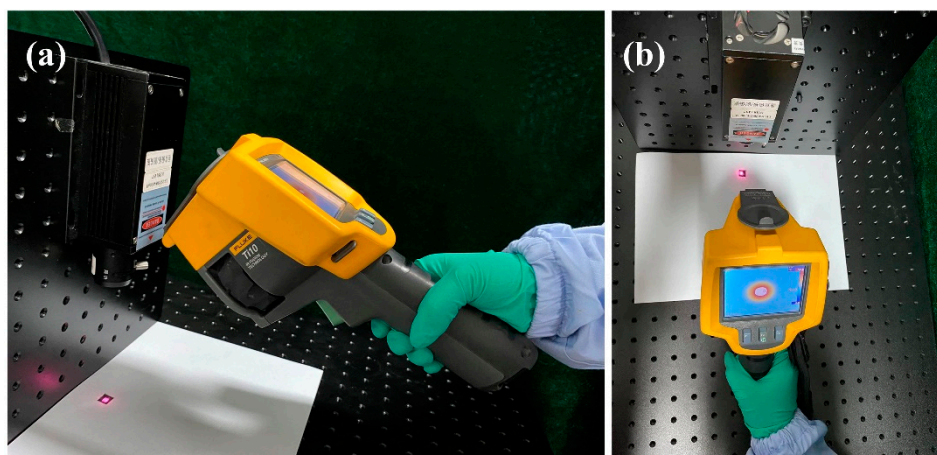

**Figure S1.** Experimental setup for the photothermal experiment: (a) side view and (b) vertical view.

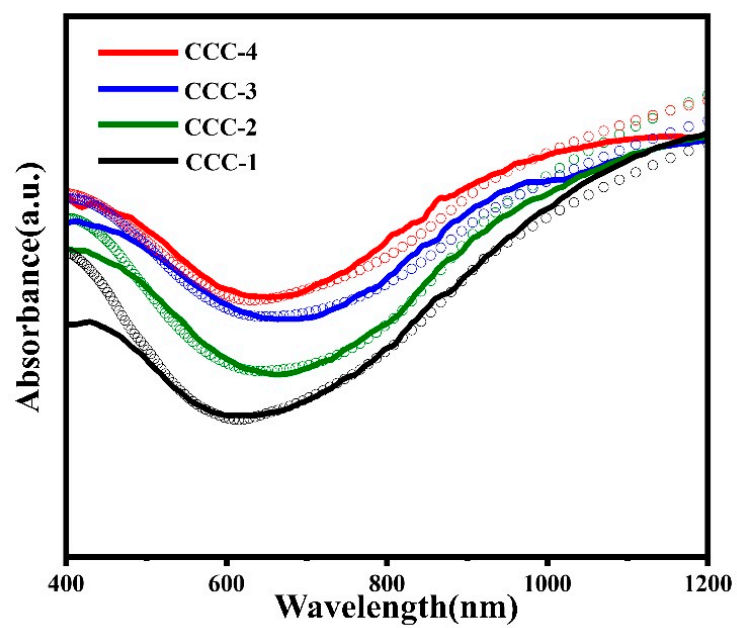

**Figure S2.** FDTD simulation (circle) and experimental data (solid line) of optical absorbance of CCC-x.

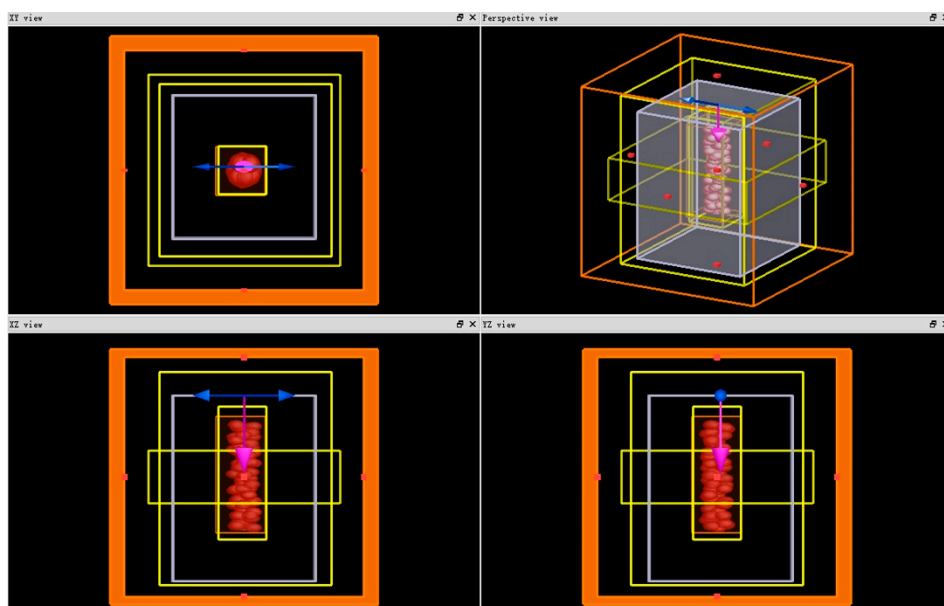

**Figure S3.** Structural model of the  $\text{Cu}_2\text{S}/\text{CuO}@\text{Cu}$  in the FDTD simulation.
